# Supplementary material for: Cetuximab promotes RSL3-induced ferroptosis by suppressing the Nrf2/HO-1 signalling pathway in KRAS mutant colorectal cancer
Source: PubMed Central journal article supplement (PMC8590697; doi:10.1038/s41419-021-04367-3), 2021-11-13
Supplement: 41419_2021_4367_MOESM2_ESM.pdf [file 41419_2021_4367_MOESM2_ESM.pdf]

Please complete the table below to indicate the contributions of all named authors to the figures.

Figure 1:

|  |
|--|
|  |
|--|

Figure 2:

|  |
|--|
|  |
|--|

Figure 3:

|  |
|--|
|  |
|--|

Figure 4:

|  |
|--|
|  |
|--|

Figure 5:

|  |
|--|
|  |
|--|

Figure 6:

|  |
|--|
|  |
|--|

Signed for and on behalf of the Author(s):

*Lechi, V*

Print Name:

|  |
|--|
|  |
|--|

Date:

|  |
|--|
|  |
|--|
